# Supplementary material
Source: PubMed Central journal article supplement (PMC4448080)
Supplement: NIHMS678630-supplement-1.pdf [file NIHMS678630-supplement-1.pdf]

## Inventory of Supplemental Information

### Figure 1. Associated Supplemental Information

Figure S1. Postembryonic zebrafish coronary vessel development.

Figure S2. Coronary vasculature remains responsive to increases in heart size and output requirement.

### Figure 2. Associated Supplemental Information

Movie S1 (Movie 1.avi). Migration of endothelial cells over the surface of the ventricle between 77dpf and 79dpf.

### Figure 3. Associated Supplemental Information

Figure S3. Cell lineage tracing of endocardial cells.

Movie S2 (Movie 2.mov). IMARIS analysis of clonal labeling of AV-canal endocardium and early angiogenic sprouts. Z-projection through AV-canal endocardial clone and contiguous angiogenic sprouts.

### Figure 4. Associated Supplemental Information

Figure S4. *cxc12b:YFP* and *cxcr4a:YFP* expression during vessel formation.

### Figure 5. Associated Supplemental Information

Figure S5. *cxcr4a* mutant zebrafish fail to develop functional coronary vasculature.

**Figure S6. Coronary vasculature develops normally in *cxcr4b* mutants, but *cxcl12b* and *cxcl12a* act redundantly.**

**Movie S3 (Movie 3.avi). Abnormal migration of *cxcr4a* mutant endothelial cells over the surface of the ventricle between 77dpf and 79dpf.**

**Figure 6. Associated Supplemental Information**

**Figure S7. Cxcl12b directs coronary vessel formation.**

**Figure 7. Associated Supplemental Information**

**[None]**
